# Supplementary material for: Synthesis of chiral heterocycles by ligand-controlled regiodivergent and enantiospecific Suzuki Miyaura cross-coupling
Source: Springer Nature journal article supplement (doi:10.1038/ncomms6474), 2014-11-18
Supplement: 41467_2014_BFncomms6474_MOESM1_ESM.mol [file 41467_2014_BFncomms6474_MOESM1_ESM.mol]

  ChemDraw11061411272D

 14 15  0  0  0  0  0  0  0  0999 V2000
   -0.7145   -1.4417    0.0000 C   0  0  0  0  0  0  0  0  0  0  0  0
   -0.7145   -2.2667    0.0000 C   0  0  0  0  0  0  0  0  0  0  0  0
   -0.0000   -2.6792    0.0000 O   0  0  0  0  0  0  0  0  0  0  0  0
    0.7145   -2.2667    0.0000 C   0  0  0  0  0  0  0  0  0  0  0  0
    0.7145   -1.4417    0.0000 C   0  0  0  0  0  0  0  0  0  0  0  0
   -0.0000   -1.0292    0.0000 C   0  0  0  0  0  0  0  0  0  0  0  0
   -0.0000   -0.2042    0.0000 C   0  0  0  0  0  0  0  0  0  0  0  0
    0.7121    0.2069    0.0000 C   0  0  0  0  0  0  0  0  0  0  0  0
    0.7145    1.0333    0.0000 C   0  0  0  0  0  0  0  0  0  0  0  0
   -0.0000    1.4458    0.0000 C   0  0  0  0  0  0  0  0  0  0  0  0
   -0.7145    1.0333    0.0000 C   0  0  0  0  0  0  0  0  0  0  0  0
   -0.7145    0.2083    0.0000 C   0  0  0  0  0  0  0  0  0  0  0  0
   -0.0000    2.2681    0.0000 O   0  0  0  0  0  0  0  0  0  0  0  0
    0.7121    2.6792    0.0000 C   0  0  0  0  0  0  0  0  0  0  0  0
  1  2  2  0      
  2  3  1  0      
  3  4  1  0      
  4  5  1  0      
  5  6  1  0      
  6  1  1  0      
  6  7  1  1      
  7  8  2  0      
  8  9  1  0      
  9 10  2  0      
 10 11  1  0      
 11 12  2  0      
 12  7  1  0      
 10 13  1  0      
 13 14  1  0      
M  END
