# Supplementary material for: Synthesis of chiral heterocycles by ligand-controlled regiodivergent and enantiospecific Suzuki Miyaura cross-coupling
Source: Springer Nature journal article supplement (doi:10.1038/ncomms6474), 2014-11-18
Supplement: 41467_2014_BFncomms6474_MOESM7_ESM.mol [file 41467_2014_BFncomms6474_MOESM7_ESM.mol]

  ChemDraw11061411272D

 21 22  0  0  0  0  0  0  0  0999 V2000
    2.1422   -1.4479    0.0000 C   0  0  0  0  0  0  0  0  0  0  0  0
    1.4277   -1.0354    0.0000 C   0  0  0  0  0  0  0  0  0  0  0  0
    0.7133   -2.2729    0.0000 C   0  0  0  0  0  0  0  0  0  0  0  0
    1.4277   -2.6854    0.0000 C   0  0  0  0  0  0  0  0  0  0  0  0
    2.1422   -2.2729    0.0000 C   0  0  0  0  0  0  0  0  0  0  0  0
    1.4277   -0.2076    0.0000 C   0  0  0  0  0  0  0  0  0  0  0  0
    2.1422    0.2049    0.0000 C   0  0  0  0  0  0  0  0  0  0  0  0
    2.1446    1.0340    0.0000 C   0  0  0  0  0  0  0  0  0  0  0  0
    1.4277    1.4479    0.0000 C   0  0  0  0  0  0  0  0  0  0  0  0
    0.7109    1.0340    0.0000 C   0  0  0  0  0  0  0  0  0  0  0  0
    0.7109    0.2062    0.0000 C   0  0  0  0  0  0  0  0  0  0  0  0
    0.7133   -1.4479    0.0000 N   0  0  0  0  0  0  0  0  0  0  0  0
   -0.7157   -1.4479    0.0000 O   0  0  0  0  0  0  0  0  0  0  0  0
   -1.4301   -1.0354    0.0000 C   0  0  0  0  0  0  0  0  0  0  0  0
   -2.1446   -0.6229    0.0000 C   0  0  0  0  0  0  0  0  0  0  0  0
   -1.4301   -0.2104    0.0000 C   0  0  0  0  0  0  0  0  0  0  0  0
   -2.1446   -1.4479    0.0000 C   0  0  0  0  0  0  0  0  0  0  0  0
   -0.0012   -1.0354    0.0000 C   0  0  0  0  0  0  0  0  0  0  0  0
   -0.0012   -0.2104    0.0000 O   0  0  0  0  0  0  0  0  0  0  0  0
    1.4277    2.2729    0.0000 O   0  0  0  0  0  0  0  0  0  0  0  0
    2.1422    2.6854    0.0000 C   0  0  0  0  0  0  0  0  0  0  0  0
  1  2  1  0      
  2 12  1  0      
 12  3  1  0      
  3  4  1  0      
  4  5  1  0      
  5  1  2  0      
  2  6  1  1      
  6  7  2  0      
  7  8  1  0      
  8  9  2  0      
  9 10  1  0      
 10 11  2  0      
 11  6  1  0      
  9 20  1  0      
 18 19  2  0      
 14 17  1  0      
 14 16  1  0      
 14 15  1  0      
 13 18  1  0      
 13 14  1  0      
 12 18  1  0      
 20 21  1  0      
M  END
