# Supplementary material for: Synthesis of chiral heterocycles by ligand-controlled regiodivergent and enantiospecific Suzuki Miyaura cross-coupling
Source: Springer Nature journal article supplement (doi:10.1038/ncomms6474), 2014-11-18
Supplement: 41467_2014_BFncomms6474_MOESM33_ESM.mol [file 41467_2014_BFncomms6474_MOESM33_ESM.mol]

  ChemDraw11061411272D

 14 15  0  0  0  0  0  0  0  0999 V2000
    0.0036   -0.8236    0.0000 C   0  0  0  0  0  0  0  0  0  0  0  0
   -0.7133   -0.4097    0.0000 C   0  0  0  0  0  0  0  0  0  0  0  0
   -1.4301   -0.8236    0.0000 O   0  0  0  0  0  0  0  0  0  0  0  0
   -1.4301   -1.6514    0.0000 C   0  0  0  0  0  0  0  0  0  0  0  0
   -0.7133   -2.0653    0.0000 C   0  0  0  0  0  0  0  0  0  0  0  0
    0.0036   -1.6514    0.0000 C   0  0  0  0  0  0  0  0  0  0  0  0
   -0.7133    0.4153    0.0000 C   0  0  0  0  0  0  0  0  0  0  0  0
   -1.4301    0.8320    0.0000 C   0  0  0  0  0  0  0  0  0  0  0  0
    0.0012    0.8278    0.0000 C   0  0  0  0  0  0  0  0  0  0  0  0
    0.7157    0.4153    0.0000 C   0  0  0  0  0  0  0  0  0  0  0  0
    1.4301    0.8278    0.0000 C   0  0  0  0  0  0  0  0  0  0  0  0
    1.4301    1.6528    0.0000 C   0  0  0  0  0  0  0  0  0  0  0  0
    0.7157    2.0653    0.0000 C   0  0  0  0  0  0  0  0  0  0  0  0
    0.0012    1.6528    0.0000 C   0  0  0  0  0  0  0  0  0  0  0  0
  1  2  1  0      
  2  3  1  0      
  3  4  1  0      
  4  5  1  0      
  5  6  1  0      
  6  1  2  0      
  2  7  1  1      
  7  8  2  0      
  7  9  1  0      
  9 10  2  0      
 10 11  1  0      
 11 12  2  0      
 12 13  1  0      
 13 14  2  0      
  9 14  1  0      
M  END
