# Supplementary material for: Synthesis of chiral heterocycles by ligand-controlled regiodivergent and enantiospecific Suzuki Miyaura cross-coupling
Source: Springer Nature journal article supplement (doi:10.1038/ncomms6474), 2014-11-18
Supplement: 41467_2014_BFncomms6474_MOESM49_ESM.mol [file 41467_2014_BFncomms6474_MOESM49_ESM.mol]

  ChemDraw11061411272D

 21 22  0  0  0  0  0  0  0  0999 V2000
   -0.7145   -0.0014    0.0000 C   0  0  0  0  0  0  0  0  0  0  0  0
   -0.7145   -0.8264    0.0000 C   0  0  0  0  0  0  0  0  0  0  0  0
    0.7145   -0.8264    0.0000 C   0  0  0  0  0  0  0  0  0  0  0  0
    0.7145   -0.0014    0.0000 C   0  0  0  0  0  0  0  0  0  0  0  0
    0.0000    0.4111    0.0000 C   0  0  0  0  0  0  0  0  0  0  0  0
    0.0000    1.2389    0.0000 C   0  0  0  0  0  0  0  0  0  0  0  0
   -0.7145    1.6514    0.0000 C   0  0  0  0  0  0  0  0  0  0  0  0
    0.0000   -1.2389    0.0000 N   0  0  0  0  0  0  0  0  0  0  0  0
    0.7145   -2.4764    0.0000 O   0  0  0  0  0  0  0  0  0  0  0  0
    0.7145   -3.3014    0.0000 C   0  0  0  0  0  0  0  0  0  0  0  0
    0.7145   -4.1264    0.0000 C   0  0  0  0  0  0  0  0  0  0  0  0
    0.0000   -3.7139    0.0000 C   0  0  0  0  0  0  0  0  0  0  0  0
    1.4289   -3.7139    0.0000 C   0  0  0  0  0  0  0  0  0  0  0  0
    0.0000   -2.0639    0.0000 C   0  0  0  0  0  0  0  0  0  0  0  0
   -0.7145   -2.4764    0.0000 O   0  0  0  0  0  0  0  0  0  0  0  0
   -0.7145    2.4764    0.0000 C   0  0  0  0  0  0  0  0  0  0  0  0
    0.0000    2.8889    0.0000 C   0  0  0  0  0  0  0  0  0  0  0  0
    0.0000    3.7139    0.0000 C   0  0  0  0  0  0  0  0  0  0  0  0
   -0.7145    4.1264    0.0000 C   0  0  0  0  0  0  0  0  0  0  0  0
   -1.4289    3.7139    0.0000 C   0  0  0  0  0  0  0  0  0  0  0  0
   -1.4289    2.8889    0.0000 C   0  0  0  0  0  0  0  0  0  0  0  0
  1  2  2  0      
  2  8  1  0      
  8  3  1  0      
  3  4  1  0      
  4  5  1  0      
  5  1  1  0      
  5  6  1  1      
  6  7  2  0      
  7 16  1  0      
 14 15  2  0      
 10 13  1  0      
 10 12  1  0      
 10 11  1  0      
  9 14  1  0      
  9 10  1  0      
  8 14  1  0      
 20 21  2  0      
 19 20  1  0      
 18 19  2  0      
 17 18  1  0      
 16 17  2  0      
 16 21  1  0      
M  END
