# Supplementary material for: Synthesis of chiral heterocycles by ligand-controlled regiodivergent and enantiospecific Suzuki Miyaura cross-coupling
Source: Springer Nature journal article supplement (doi:10.1038/ncomms6474), 2014-11-18
Supplement: 41467_2014_BFncomms6474_MOESM57_ESM.mol [file 41467_2014_BFncomms6474_MOESM57_ESM.mol]

  ChemDraw11061411272D

 23 25  0  0  0  0  0  0  0  0999 V2000
    1.4253   -0.8292    0.0000 C   0  0  0  0  0  0  0  0  0  0  0  0
    0.7109   -0.4167    0.0000 C   0  0  0  0  0  0  0  0  0  0  0  0
   -0.0036   -1.6542    0.0000 C   0  0  0  0  0  0  0  0  0  0  0  0
    0.7109   -2.0667    0.0000 C   0  0  0  0  0  0  0  0  0  0  0  0
    1.4253   -1.6542    0.0000 C   0  0  0  0  0  0  0  0  0  0  0  0
    0.7109    0.4111    0.0000 C   0  0  0  0  0  0  0  0  0  0  0  0
    1.4253    0.8236    0.0000 C   0  0  0  0  0  0  0  0  0  0  0  0
    1.4277    1.6528    0.0000 C   0  0  0  0  0  0  0  0  0  0  0  0
    0.7109    2.0667    0.0000 C   0  0  0  0  0  0  0  0  0  0  0  0
   -0.0060    1.6528    0.0000 C   0  0  0  0  0  0  0  0  0  0  0  0
   -0.0060    0.8250    0.0000 C   0  0  0  0  0  0  0  0  0  0  0  0
    2.1446    0.4111    0.0000 N   0  0  0  0  0  0  0  0  0  0  0  0
    2.8615    0.8250    0.0000 C   0  0  0  0  0  0  0  0  0  0  0  0
    2.8615    1.6528    0.0000 C   0  0  0  0  0  0  0  0  0  0  0  0
    2.1446    2.0667    0.0000 C   0  0  0  0  0  0  0  0  0  0  0  0
   -0.0036   -0.8292    0.0000 N   0  0  0  0  0  0  0  0  0  0  0  0
   -1.4326   -0.8292    0.0000 O   0  0  0  0  0  0  0  0  0  0  0  0
   -2.1470   -0.4167    0.0000 C   0  0  0  0  0  0  0  0  0  0  0  0
   -2.8615   -0.0042    0.0000 C   0  0  0  0  0  0  0  0  0  0  0  0
   -2.1470    0.4083    0.0000 C   0  0  0  0  0  0  0  0  0  0  0  0
   -2.8615   -0.8292    0.0000 C   0  0  0  0  0  0  0  0  0  0  0  0
   -0.7181   -0.4167    0.0000 C   0  0  0  0  0  0  0  0  0  0  0  0
   -0.7181    0.4083    0.0000 O   0  0  0  0  0  0  0  0  0  0  0  0
  1  2  1  0      
  2 16  1  0      
 16  3  1  0      
  3  4  1  0      
  4  5  1  0      
  5  1  2  0      
  2  6  1  1      
  6  7  2  0      
  7  8  1  0      
  8  9  2  0      
  9 10  1  0      
 10 11  2  0      
 11  6  1  0      
  7 12  1  0      
 12 13  2  0      
 13 14  1  0      
 14 15  2  0      
 15  8  1  0      
 22 23  2  0      
 18 21  1  0      
 18 20  1  0      
 18 19  1  0      
 17 22  1  0      
 17 18  1  0      
 16 22  1  0      
M  END
