# Supplementary material for: Synthesis of chiral heterocycles by ligand-controlled regiodivergent and enantiospecific Suzuki Miyaura cross-coupling
Source: Springer Nature journal article supplement (doi:10.1038/ncomms6474), 2014-11-18
Supplement: 41467_2014_BFncomms6474_MOESM59_ESM.mol [file 41467_2014_BFncomms6474_MOESM59_ESM.mol]

  ChemDraw11061411272D

 19 20  0  0  0  0  0  0  0  0999 V2000
    1.7902   -0.8217    0.0000 C   0  0  0  0  0  0  0  0  0  0  0  0
    1.0730   -0.4139    0.0000 C   0  0  0  0  0  0  0  0  0  0  0  0
    0.3668   -1.6561    0.0000 C   0  0  0  0  0  0  0  0  0  0  0  0
    1.0839   -2.0638    0.0000 C   0  0  0  0  0  0  0  0  0  0  0  0
    1.7957   -1.6466    0.0000 C   0  0  0  0  0  0  0  0  0  0  0  0
    1.0676    0.4139    0.0000 C   0  0  0  0  0  0  0  0  0  0  0  0
    1.7793    0.8311    0.0000 C   0  0  0  0  0  0  0  0  0  0  0  0
    1.7739    1.6561    0.0000 N   0  0  0  0  0  0  0  0  0  0  0  0
    1.0567    2.0638    0.0000 C   0  0  0  0  0  0  0  0  0  0  0  0
    0.3450    1.6466    0.0000 C   0  0  0  0  0  0  0  0  0  0  0  0
    0.3504    0.8217    0.0000 C   0  0  0  0  0  0  0  0  0  0  0  0
    0.3613   -0.8311    0.0000 N   0  0  0  0  0  0  0  0  0  0  0  0
   -0.3613    0.4017    0.0000 O   0  0  0  0  0  0  0  0  0  0  0  0
   -1.0785    0.8094    0.0000 C   0  0  0  0  0  0  0  0  0  0  0  0
   -1.7902    0.3922    0.0000 C   0  0  0  0  0  0  0  0  0  0  0  0
   -1.7957    1.2172    0.0000 C   0  0  0  0  0  0  0  0  0  0  0  0
   -1.0839    1.6344    0.0000 C   0  0  0  0  0  0  0  0  0  0  0  0
   -0.3559   -0.4233    0.0000 C   0  0  0  0  0  0  0  0  0  0  0  0
   -1.0676   -0.8405    0.0000 O   0  0  0  0  0  0  0  0  0  0  0  0
  1  2  1  0      
  2 12  1  0      
 12  3  1  0      
  3  4  1  0      
  4  5  1  0      
  5  1  2  0      
  2  6  1  6      
  6  7  2  0      
  7  8  1  0      
  8  9  2  0      
  9 10  1  0      
 10 11  2  0      
 11  6  1  0      
 18 19  2  0      
 14 17  1  0      
 14 16  1  0      
 14 15  1  0      
 13 18  1  0      
 13 14  1  0      
 12 18  1  0      
M  END
