# Supplementary material for: Synthesis of chiral heterocycles by ligand-controlled regiodivergent and enantiospecific Suzuki Miyaura cross-coupling
Source: Springer Nature journal article supplement (doi:10.1038/ncomms6474), 2014-11-18
Supplement: 41467_2014_BFncomms6474_MOESM71_ESM.mol [file 41467_2014_BFncomms6474_MOESM71_ESM.mol]

ncomms6474-comp40.cdx
  ChemDraw11061411302D

 22 23  0  0  0  0  0  0  0  0999 V2000
    0.7158    0.1999    0.0000 C   0  0  0  0  0  0  0  0  0  0  0  0
    0.0027    0.6147    0.0000 C   0  0  0  0  0  0  0  0  0  0  0  0
   -0.7131    0.2045    0.0000 C   0  0  0  0  0  0  0  0  0  0  0  0
   -0.7158   -0.6205    0.0000 C   0  0  0  0  0  0  0  0  0  0  0  0
    0.7132   -0.6251    0.0000 C   0  0  0  0  0  0  0  0  0  0  0  0
    0.0054    1.4424    0.0000 C   0  0  0  0  0  0  0  0  0  0  0  0
    0.7215    1.8531    0.0000 C   0  0  0  0  0  0  0  0  0  0  0  0
    0.7265    2.6822    0.0000 C   0  0  0  0  0  0  0  0  0  0  0  0
    0.0110    3.0984    0.0000 C   0  0  0  0  0  0  0  0  0  0  0  0
   -0.7072    2.6869    0.0000 C   0  0  0  0  0  0  0  0  0  0  0  0
   -0.7102    1.8587    0.0000 C   0  0  0  0  0  0  0  0  0  0  0  0
    0.0137    3.9228    0.0000 F   0  0  0  0  0  0  0  0  0  0  0  0
    1.4316    0.6100    0.0000 C   0  0  0  0  0  0  0  0  0  0  0  0
    1.4316    1.4378    0.0000 O   0  0  0  0  0  0  0  0  0  0  0  0
   -0.0026   -1.0353    0.0000 N   0  0  0  0  0  0  0  0  0  0  0  0
   -0.7171   -2.2728    0.0000 O   0  0  0  0  0  0  0  0  0  0  0  0
   -0.7171   -3.0978    0.0000 C   0  0  0  0  0  0  0  0  0  0  0  0
   -0.0026   -3.5103    0.0000 C   0  0  0  0  0  0  0  0  0  0  0  0
   -0.7171   -3.9228    0.0000 C   0  0  0  0  0  0  0  0  0  0  0  0
   -1.4316   -3.5103    0.0000 C   0  0  0  0  0  0  0  0  0  0  0  0
   -0.0026   -1.8603    0.0000 C   0  0  0  0  0  0  0  0  0  0  0  0
    0.7118   -2.2728    0.0000 O   0  0  0  0  0  0  0  0  0  0  0  0
  1  2  1  0      
  2  3  1  0      
  3  4  1  0      
  4 15  1  0      
 15  5  1  0      
  5  1  1  0      
  2  6  1  6      
  6  7  2  0      
  7  8  1  0      
  8  9  2  0      
  9 10  1  0      
 10 11  2  0      
 11  6  1  0      
  9 12  1  0      
  1 13  1  1      
 13 14  1  0      
 21 22  2  0      
 17 20  1  0      
 17 19  1  0      
 17 18  1  0      
 16 21  1  0      
 16 17  1  0      
 15 21  1  0      
M  END
